# Supplementary material for: Theoretical constructs of smoking cessation among current tobacco smokers in India: a secondary analysis of Global Adult Tobacco Survey-2 (2016–2017)
Source: HighWire-hosted journal article supplement (doi:10.1136/bmjopen-2021-050916), 2022-01-01
Supplement: bmjopen-2021-050916supp001_data_supplement.pdf [file bmjopen-2021-050916supp001_data_supplement.pdf]

The following questions were used to conduct the analysis:

| Code                  | Question                                                                                                                                                                                                                                                                                       |
|-----------------------|------------------------------------------------------------------------------------------------------------------------------------------------------------------------------------------------------------------------------------------------------------------------------------------------|
| A03                   | How old are you?                                                                                                                                                                                                                                                                               |
| A04                   | What is the highest level of education you have completed?                                                                                                                                                                                                                                     |
| A05                   | Which of the following best describes your main work status over the past 12 months?                                                                                                                                                                                                           |
| A09                   | Do you belong to a scheduled caste, scheduled tribe, other backward caste, or none of these groups?                                                                                                                                                                                            |
| A11                   | What is your marital status? Would you say single, married, separated, divorced, or widowed?                                                                                                                                                                                                   |
| B01                   | Do you currently smoke tobacco on a daily basis, less than daily, or not at all?                                                                                                                                                                                                               |
| B04, B05, B08, B09    | (daily smokers) How old were you when you first started smoking tobacco daily? How many years ago did you first start smoking tobacco daily?<br>(less than daily) how old were you when you first started smoking tobacco daily? How many years ago did you first start smoking tobacco daily? |
| B07                   | How soon after you wake up do you usually have your first smoke?                                                                                                                                                                                                                               |
| D01                   | The next questions ask about any attempts to stop smoking that you might have made during the past 12 months. Please think about tobacco smoking. During the past 12 months, have you tried to stop smoking?                                                                                   |
| D03 (D03A to D03E)    | During the past 12 months, did you use any of the following to try to stop smoking tobacco?                                                                                                                                                                                                    |
| D08                   | Which of the following best describes your thinking about quitting smoking?                                                                                                                                                                                                                    |
| G01 (G01A to G01I)    | In the last 30 days, have you noticed information about the dangers of smoking tobacco or that encourages quitting in any of the following places?                                                                                                                                             |
| G04 (G04A to G04K)    | In the last 30 days, have you noticed any advertisements or signs promoting smoking tobacco products in the following places?                                                                                                                                                                  |
| G06 (G06A to G06G)    | In the last 30 days, have you noticed any of the following types of cigarette promotions?                                                                                                                                                                                                      |
| G206 (G206A to G206G) | In the last 30 days, have you noticed any of the following types of Bidi promotions?                                                                                                                                                                                                           |
| H01                   | Based on what you know or believe, does smoking tobacco cause serious illness?                                                                                                                                                                                                                 |
| HH07                  | Based on what you know or believe, has smoking already done any harm to your body? Would you say definitely no, probably no, probably yes, or definitely yes?                                                                                                                                  |
